# Supplementary material
Source: PubMed Central journal article supplement (PMC8084718)
Supplement: mmc1.pdf [file mmc1.pdf]

## **ISN-GKHA: Structures, organization and services for the management of kidney failure in Eastern and Central Europe**

### **Supplementary Tables, Figures, and Appendix**

**Table S1:** Burden of chronic kidney disease and its risk factors in Eastern and Central European countries participating in the ISN-GKHA survey.

**Figure S1:** Shortages in kidney failure providers identified by responding countries in Eastern and Central Europe.

**Appendix:** Reference list for annual cost of kidney replacement therapy (for Table 1).

**Table S1:** Burden of chronic kidney disease and its risk factors in Eastern and Central European countries participating in the ISN-GKHA survey.<sup>S1,S2</sup>

| Country                | CKD Prevalence % (95% CI) | Deaths attributed to CKD % (95% CI) | DALYs attributed to CKD % (95% CI) | Obesity % (95% CI) | High BP % (95% CI) | Smoking % (95% CI) |
|------------------------|---------------------------|-------------------------------------|------------------------------------|--------------------|--------------------|--------------------|
| Albania                | 10.18 (9.43 - 11.05)      | 1.67 (1.52 - 1.96)                  | 1.31 (1.17 - 1.46)                 | 22.3 (17.4 - 27.4) | 29.0 (22.4 - 36.2) | 15.6 (14.0 - 17.3) |
| Bosnia and Herzegovina | 12.94 (11.97 - 14.06)     | 1.63 (1.51 - 1.76)                  | 1.28 (1.17 - 1.39)                 | 19.4 (15.1 - 24.1) | 30.8 (24.5 - 37.6) | 30.5 (27.3 - 33.7) |
| Bulgaria               | 14.32 (13.28 - 15.5)      | 1.34 (1.27 - 1.42)                  | 1.25 (1.17 - 1.35)                 | 27.4 (21.8 - 33.3) | 28.4 (21.7 - 35.5) | 30.3 (27.2 - 33.3) |
| Croatia                | 13.64 (12.61 - 14.79)     | 1.62 (1.54 - 1.71)                  | 1.11 (1.02 - 1.2)                  | 27.1 (22.4 - 32.1) | 32.4 (26.4 - 39.3) | 27.0 (24.1 - 30.1) |
| Cyprus                 | 8.95 (8.33 - 9.67)        | 3.3 (2.5 - 3.61)                    | 1.55 (1.24 - 1.77)                 | 22.6 (17.4 - 28.3) | 19.8 (14.1 - 26.7) | 26.3 (23.9 - 28.9) |
| Czech Republic         | 13.52 (12.52 - 14.69)     | 1.14 (1.08 - 1.2)                   | 0.9 (0.83 - 0.97)                  | 28.5 (23.5 - 33.9) | 27.9 (21.5 - 34.7) | 24.5 (21.9 - 27.2) |
| Estonia                | 20.64 (19.16 - 22.22)     | 1.76 (1.63 - 1.88)                  | 1.16 (1.06 - 1.26)                 | 23.8 (19.8 - 28.1) | 27.4 (22.3 - 32.9) | 22.2 (20.1 - 24.4) |
| Hungary                | 14.09 (13.02 - 15.28)     | 1.27 (1.22 - 1.33)                  | 0.94 (0.88 - 1)                    | 28.6 (23.5 - 34.0) | 30.0 (23.3 - 36.9) | 25.1 (22.2 - 28.0) |
| Kosovo                 | -                         | -                                   | -                                  | -                  | -                  | -                  |
| Latvia                 | 20.67 (19.2 - 22.42)      | 0.92 (0.87 - 0.98)                  | 0.84 (0.79 - 0.91)                 | 25.7 (19.9 - 31.7) | 29.4 (22.6 - 36.9) | 26.9 (24.7 - 29.2) |
| Lithuania              | 19.47 (18.03 - 21.11)     | 0.62 (0.59 - 0.65)                  | 0.63 (0.59 - 0.68)                 | 28.4 (23.2 - 33.8) | 29.3 (22.4 - 36.6) | 22.6 (20.4 - 24.9) |
| Macedonia              | 12.03 (11.16 - 13.06)     | 1.61 (1.48 - 1.76)                  | 1.31 (1.19 - 1.44)                 | 23.9 (18.4 - 29.6) | 28.5 (21.9 - 36.1) | 31.4 (28.3 - 34.7) |
| Moldova                | 16.28 (15.03 - 17.62)     | 0.5 (0.47 - 0.52)                   | 0.61 (0.57 - 0.65)                 | 20.1 (15.1 - 25.5) | 29.8 (23.1 - 37.0) | 19.4 (18.0 - 21.2) |
| Montenegro             | 11.90 (11.02 - 12.90)     | 1.95 (1.78 - 2.12)                  | 1.43 (1.29 - 1.58)                 | 24.9 (19.2 - 30.7) | 29.1 (22.4 - 36.1) | 31.0 (28.0 - 34.0) |
| Poland                 | 11.73 (10.77 - 12.9)      | 0.87 (0.83 - 0.92)                  | 0.74 (0.68 - 0.8)                  | 25.6 (21.9 - 29.5) | 28.7 (23.0 - 35.0) | 24.1 (21.7 - 26.8) |
| Romania                | 12.26 (11.26 - 13.33)     | 1.17 (1.11 - 1.22)                  | 1 (0.94 - 1.07)                    | 24.5 (20.0 - 29.3) | 30.0 (23.4 - 37.3) | 21.9 (19.6 - 24.4) |
| Serbia                 | 13.32 (12.38 - 14.42)     | 1.93 (1.61 - 2.07)                  | 1.45 (1.27 - 1.59)                 | 23.5 (19.1 - 28.1) | 29.5 (23.4 - 35.6) | 23.8 (20.9 - 27.0) |
| Slovakia               | 11.93 (11.04 - 12.94)     | 1.35 (1.26 - 1.45)                  | 1.03 (0.94 - 1.12)                 | 22.4 (17.9 - 27.3) | 28.5 (22.5 - 34.9) | 20.9 (18.3 - 23.6) |
| Slovenia               | 13.4 (12.41 - 14.57)      | 1.07 (1 - 1.15)                     | 0.75 (0.69 - 0.81)                 | 22.5 (17.2 - 28.2) | 30.5 (23.9 - 37.9) | 20.2 (17.8 - 22.7) |
| Turkey                 | 11.83 (10.92 - 12.94)     | 3.77 (3.41 - 4.02)                  | 2.18 (1.96 - 2.38)                 | 32.2 (28.4 - 36.1) | 20.3 (15.9 - 24.9) | 22.9 (20.1 - 26.0) |

Abbreviations: ISN: International Society of Nephrology; GKHA: Global Kidney Health Atlas; CKD: chronic kidney disease; DALYs: disability-adjusted life years; BP: blood pressure; CI: confidence interval

“-“: Data not reported/unavailable

Results are expressed as percentage (%) of the population

**Figure S1:** Shortages in kidney failure providers identified by responding countries in Eastern and Central Europe.

|                         | Nephrologists | Transplant surgeons | Surgeons (HD access) | Surgeons (PD access) | Interventional radiologists (HD access) | Interventional radiologists (PD access) | Dietitians | Laboratory technicians | Radiologists (ultrasound) | Vascular access coordinators | Counsellors/psychologists | Transplant coordinators | Dialysis nurses | Dialysis technicians | TOTAL SHORTAGE |
|-------------------------|---------------|---------------------|----------------------|----------------------|-----------------------------------------|-----------------------------------------|------------|------------------------|---------------------------|------------------------------|---------------------------|-------------------------|-----------------|----------------------|----------------|
| <b>Total shortage →</b> | <b>13</b>     | <b>10</b>           | <b>13</b>            | <b>6</b>             | <b>6</b>                                | <b>5</b>                                | <b>0</b>   | <b>14</b>              | <b>1</b>                  | <b>10</b>                    | <b>9</b>                  | <b>7</b>                | <b>10</b>       | <b>4</b>             |                |
| Albania                 |               |                     |                      |                      |                                         |                                         |            |                        |                           |                              |                           |                         |                 |                      | 5              |
| Bosnia and Herzegovina  |               |                     |                      |                      |                                         |                                         |            |                        |                           |                              |                           |                         |                 |                      | 7              |
| Bulgaria                |               |                     |                      |                      |                                         |                                         |            |                        |                           |                              |                           |                         |                 |                      | 6              |
| Croatia                 |               |                     |                      |                      |                                         |                                         |            |                        |                           |                              |                           |                         |                 |                      | 6              |
| Cyprus                  |               |                     |                      |                      |                                         |                                         |            |                        |                           |                              |                           |                         |                 |                      | 0              |
| Czech Republic          |               |                     |                      |                      |                                         |                                         |            |                        |                           |                              |                           |                         |                 |                      | 2              |
| Estonia                 |               |                     |                      |                      |                                         |                                         |            |                        |                           |                              |                           |                         |                 |                      | 10             |
| Hungary                 |               |                     |                      |                      |                                         |                                         |            |                        |                           |                              |                           |                         |                 |                      | 9              |
| Kosovo                  |               |                     |                      |                      |                                         |                                         |            |                        |                           |                              |                           |                         |                 |                      | 4              |
| Latvia                  |               |                     |                      |                      |                                         |                                         |            |                        |                           |                              |                           |                         |                 |                      | 6              |
| Lithuania               |               |                     |                      |                      |                                         |                                         |            |                        |                           |                              |                           |                         |                 |                      | 4              |
| Macedonia               |               |                     |                      |                      |                                         |                                         |            |                        |                           |                              |                           |                         |                 |                      | 8              |
| Moldova                 |               |                     |                      |                      |                                         |                                         |            |                        |                           |                              |                           |                         |                 |                      | 6              |
| Poland                  |               |                     |                      |                      |                                         |                                         |            |                        |                           |                              |                           |                         |                 |                      | 4              |
| Romania                 |               |                     |                      |                      |                                         |                                         |            |                        |                           |                              |                           |                         |                 |                      | 11             |
| Serbia                  |               |                     |                      |                      |                                         |                                         |            |                        |                           |                              |                           |                         |                 |                      | 5              |
| Slovak Republic         |               |                     |                      |                      |                                         |                                         |            |                        |                           |                              |                           |                         |                 |                      | 4              |
| Slovenia                |               |                     |                      |                      |                                         |                                         |            |                        |                           |                              |                           |                         |                 |                      | 7              |
| Turkey                  |               |                     |                      |                      |                                         |                                         |            |                        |                           |                              |                           |                         |                 |                      | 4              |

Abbreviations: HD: hemodialysis, PD: peritoneal dialysis

|             |
|-------------|
| No shortage |
| Shortage    |

## Supplementary References:

- S1. Institute for Health Metrics and Evaluation. Global Burden of Disease Study 2017 (GBD 2017) Data Resources. Available at: <http://ghdx.healthdata.org/gbd-2017>. Accessed August 6, 2020.
- S2. World Health Organization. The Global Health Observatory. Available at: <https://www.who.int/gho/en/>. Published 2019. Accessed: August 6, 2020.

**Appendix:** Reference list for annual cost of kidney replacement therapy (for Table 1) (APA format).

Čala, S. Peritoneal dialysis in Croatia. *Perit Dial Int.* 2007; 27(3), 238-244.

Erek, E., Sever, M. Ş., Akoglu, E., et al. Cost of renal replacement therapy in Turkey. *Nephrology*, 2004; 9(1), 33-38.

Gazdikova, K., Korecka, P., Springer, V., et al. Pharmacoeconomic aspects of patients treated by hemodialysis. *Bratislavske lekarske listy*, 2003; 104(10), 329-334.

Iannazzo, S., Carsi, M., Chiroli, S. A cost-utility analysis of cinacalcet in secondary hyperparathyroidism in five European countries. *Applied health economics and health policy*, 2012; 10(2), 127-138.

Kaló, Z., Járny, J., Nagy, J. Economic evaluation of kidney transplantation versus hemodialysis in patients with end-stage renal disease in Hungary. *Progress in Transplantation*, 2001; 11(3), 188-193.

Kandus, A., Arnol, M., Bren, A. F. Renal transplantation in Slovenia after joining Eurotransplant. *Nephrol Dial Transplant.* 2006; 21(1), 36-39.

Kandus, A., Arnol, M., Bren, A. F. Survey of renal transplantation in Slovenia. *Therapeutic Apheresis and Dialysis*, 2009; 13(4), 264-267.

Mogyorosy, Z., Mucsi, I., & Rosivall, L. Renal replacement therapy in Hungary: the decade of transition. *Nephrol Dialysis Transplantation*, 2003; 18(6), 1066-1071.

- Neil, N., Walker, D. R., Sesso, R., et al. Gaining efficiencies: resources and demand for dialysis around the globe. *Value in Health*, 2009; 12(1), 73-79.
- Perović, S., & Janković, S. Renal transplantation vs hemodialysis: cost-effectiveness analysis. *Vojnosanitetski pregled*, 2009; 66(8), 639-644.
- Ursea, N., Mircescu, G., Constantinovici, N., et al. Nephrology and renal replacement therapy in Romania. *Nephrol Dial Transplant*. 1997; 12(4), 684-690.
- Utaş, C. The development of PD in Turkey. *Perit Dial Int*, 2008; 28(3), 217-219.
- Vaičiūnienė, R., Kuzminskis, V., & Bumblytė, I. A. Hospitalization in hemodialysis patients in one region of Lithuania. *The International Journal of Artificial Organs*, 2005; 28(12), 1228-1231.
- van der Tol, A., Lameire, N., Morton, R. L., et al. An international analysis of dialysis services reimbursement. *Clin J Am Soc Nephrol*, 2019; 14(1), 84-93.
- Vazelov, E. S., Krivoshiev, S. G., Antonov, S. A., et al. End-stage renal disease and peritoneal dialysis in Bulgaria. *Perit Dial Int*, 2004; 24(6), 512.
- Wordsworth, S., Ludbrook, A., Caskey, F., et al. Collecting unit cost data in multicentre studies. *The European Journal of Health Economics*, 2005; 6(1), 38-44.
